# Supplementary material for: Dynamic microtubule organization and mitochondrial transport are regulated by distinct Kinesin-1 pathways
Source: Oxford University Press journal article supplement (doi:10.1242/bio.015206), 2015-11-18
Supplement: bio015206supp.pdf [file bio015206supp.pdf]

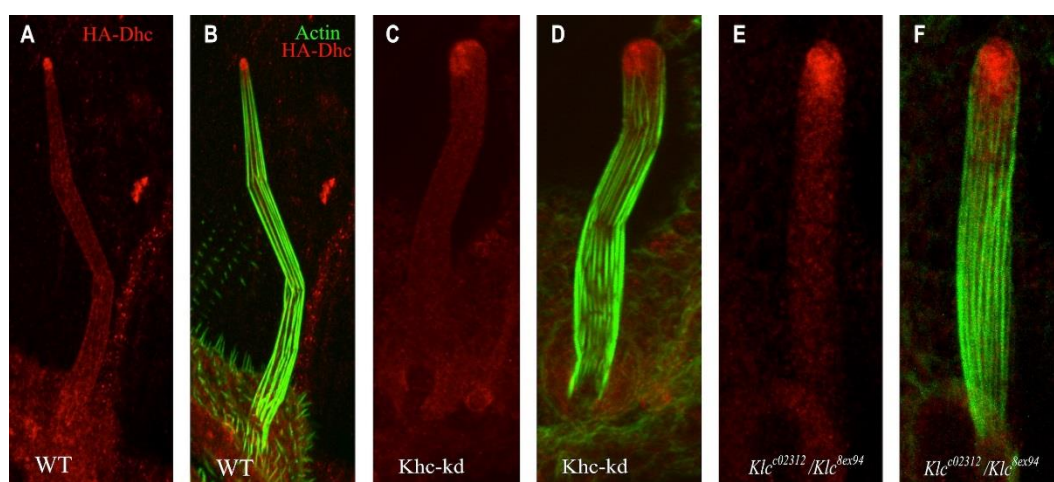

**Figure S1: Dhc distribution is affected in *Khc-kd* and *Klc* mutants bristle.** Confocal projections of bristles from wild type (A-B), *Khc-RNAi*; *HA-Dhc64C*; *neur-Gal4* (C-D) and *Klc<sup>c02312</sup>/Klc<sup>8ex94</sup>* (E-F) pupae stained with anti-HA tagged (A-F) antibodies. Similarly to WT, Dhc64C accumulate at the tip of the bristle in *Khc* and *Klc* mutants, however shows more diffused pattern.

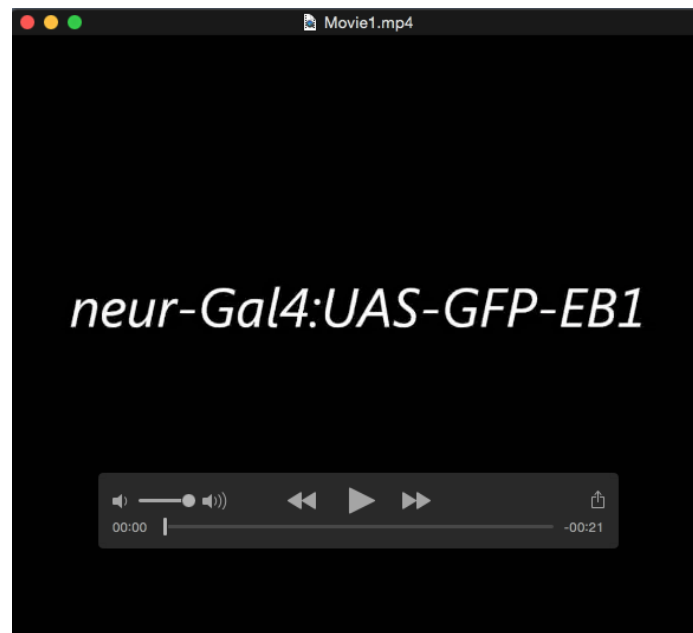

**Movie 1. Tracking bristle elongation.** Time-lapse confocal projections of an elongating posterior scutellar bristle expressing GFP-EB1 from wild type, pUAS Khc-RNAi or sca-Gal4; pUAS GFP-EB1; *klc*<sup>c02312</sup>/*klc*<sup>8ex94</sup> flies.

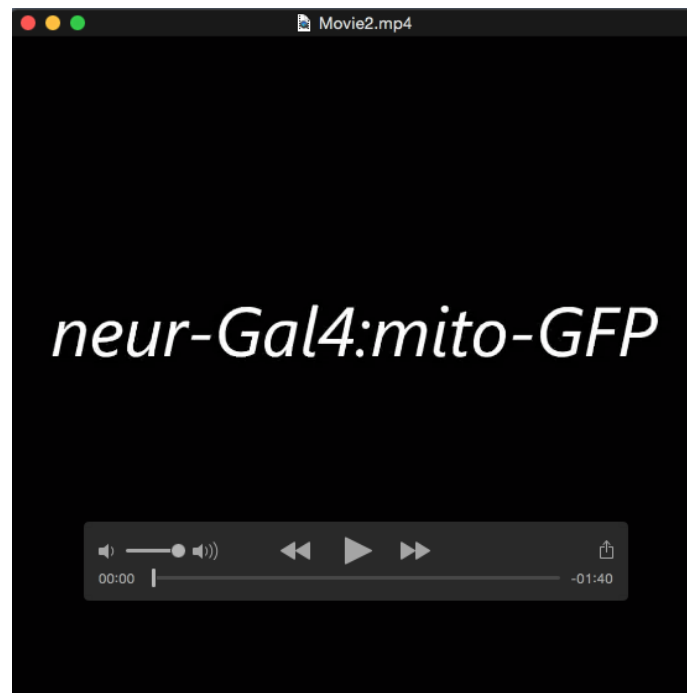

**Movie 2. Tracking of mitochondria in elongating bristles.** Tracking of a mitochondrial reporter (*sca-Gal4:mito-GFP*) in wild type, *Khc-kd*, *klc<sup>c02312</sup>/klc<sup>8ex94</sup>* and *Dhc64C<sup>8-10</sup>/Dhc64C<sup>4-19</sup>* flies. Since we found that in *Dhc64C* mutants mitochondria movement was much slower than wild type, instead of using the imaging conditions (~1 frame every 3 s) suitable for the wild type, *Khc-kd* and *Klc* genotypes, one frame was taken every 10 s to visualize mitochondrial movement in the *Dhc64C* mutant.

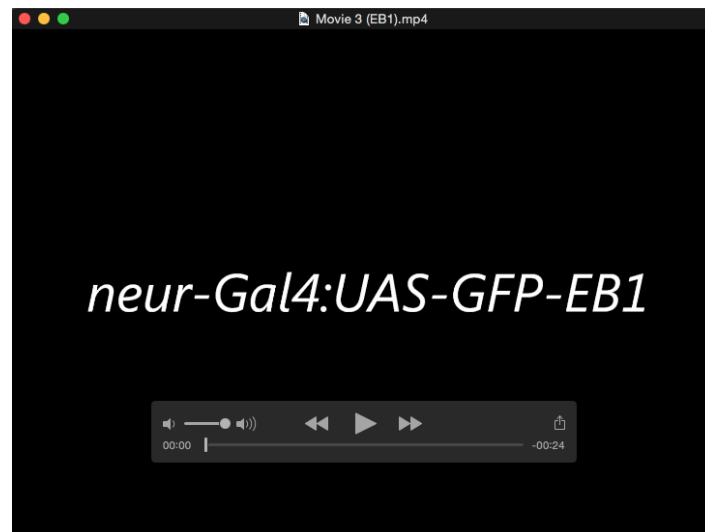

**Movie 3. Tracking EB1 movement.** Tracking of the reporter of MT plus-end dynamics GFP-EB1 (*neur-Gal4; pUAS GFP-EB1*) in an elongating wild type bristle tip, *pUAS Khc-RNAi* and *sca-Gal4; pUAS GFP-EB1; klc<sup>c02312</sup>/ klc<sup>8ex94</sup>* using time-lapse confocal microscopy. Images were analyzed by time-lapse confocal microscopy using a laser-scanning confocal (Olympus FV1000 Laser scanning confocal microscope). Frames were taken every 3 s in the Kalman mode, 70 frames overall.
